# Supplementary material
Source: publisher site journal article supplement (https://www.dovepress.com/article/189025)
Supplement: Supplementary file 2 [file get_supplementary_file.php]

**Table S1.** Probes used in this work.

| Manufacturer                                                  | Name                     | Target                              | Dye Color                     | Catalog number    | Use in figure              |                           |
|---------------------------------------------------------------|--------------------------|-------------------------------------|-------------------------------|-------------------|----------------------------|---------------------------|
|                                                               | GLP 13 / 21              | 13q14/21q22                         | G/ R                          | F01001            |                            |                           |
|                                                               | GLP <i>P53</i> / 1q21    | 17p13.1/1q21                        | G/R                           | F01003/<br>F01003 | Figure S3 E                |                           |
|                                                               | GLP <i>IGH</i>           | 14q32                               | R/ G                          | F01003            | Figure S3C                 |                           |
|                                                               | GLP <i>C-MYC</i>         | 8q24                                | R/G                           | F04016M           | Figure 2 D                 |                           |
|                                                               | GLP <i>BCR / ABL</i>     | 22q11/9q34                          | G/ R                          | F01005            | Figure S4 C<br>Figure S7 C |                           |
|                                                               | GLP <i>TEL / AML1</i>    | 12p13/21q22                         | R/ G                          | F01036            | Figure 2 E                 |                           |
|                                                               | GLP <i>MLL</i>           | 11q23                               | G /R                          | F01036            | Figure 3 B                 |                           |
|                                                               | GLP <i>D7S486 / CSP7</i> | 7q31/7p11-q11                       | R/G                           | F01032            | Figure S7 D                |                           |
| Beijing<br>Medical<br>Technology<br>Ltd.                      | Jinpujia<br>Co.,         | CSP X / Y                           | Xp11.1-q11.1/<br>Yp11.1-q11.1 | G /R              | F01006                     |                           |
|                                                               |                          | GLP <i>PML / RARA</i>               | 15q22/17q21                   | G/ R              | F01023                     | Figure S8 B               |
|                                                               |                          | GLP <i>AML1 / ETO</i>               | 21q22/8q22                    | G/ R              | F01025                     | Figure 2 C<br>Figure S2 C |
|                                                               |                          | GLP <i>IGH / CCND1</i>              | 14q32/11q13                   | G/ R              | F01019                     |                           |
|                                                               |                          | GLP <i>BCL6</i>                     | 3q27                          | R /G              | F04011M                    |                           |
|                                                               |                          | CSP 3 / CSP 7                       | 3p11.1-q11.1/7p1<br>1.1-q11.1 | R/G               | F01008                     |                           |
|                                                               |                          | GLP <i>D20S108 / CSP8</i>           | 20q12/8p11-q11                | R/G               | F01032                     |                           |
|                                                               |                          | GLP <i>CSF1R / D5S23<br/>D5S721</i> | 5q33/5p15                     | R/G               | F01032                     |                           |
|                                                               |                          | GLP <i>p16 / CSP 17</i>             | 9p21/17p11.1-q11<br>.1        | R/ G              | F01008                     | Figure S4 B               |
| Guangzhou<br>Anbiping<br>Pharmaceutical<br>Technology<br>Ltd. | Co.,                     | GSP <i>IGH / CCND3</i>              | 6p21/14q32                    | G/R               | F.01123-01                 | Figure S3 D               |
|                                                               |                          | GSP <i>EWSR1</i>                    | 22q12                         | G/R               | F.01194-0                  | Figure S2 B               |
|                                                               |                          | GSP <i>PDGFRB</i>                   | 5q32                          | G/R               | F.01033-01                 |                           |
|                                                               |                          | GSP <i>TCF3 / PBX1</i>              | 1q23/19p13                    | R/G               | F.01095-01                 |                           |



|    |          |          |          |          |          |        |          |          |        |          |          |          |        |          |          |        |        |          |          |
|----|----------|----------|----------|----------|----------|--------|----------|----------|--------|----------|----------|----------|--------|----------|----------|--------|--------|----------|----------|
| 4  | 4G4O(32) | 4G4O(10) | 3G3O(38) | 3G4O(40) | 2G(100)  | 3F(34) | 3G3O(38) | 4G3O(10) | 3F(42) | 5F(35)   | 3G3O(41) | 4G4O(40) | 3F(37) | 4G3O(37) | 3G4O(40) | 2F101G | 3F(39) | 3G3O(36) | 4G4O(40) |
|    | 4G5O(10) | 4GMO(30) | 4G3O(4)  | 2G2O(60) |          | 4F(10) | 2G2O(62) | 3G3O(20) | 2F(58) | 4F(8)    | 2G2O(59) | 2G2O(60) | 2F(62) | 2G2O(63) | 2G2O(60) | (40)   | 2G2O   | 3G4O(5)  | 4G5O(4)  |
|    | 2G2O(58) | 2G2O(60) | 2G2O(58) |          |          | 2F(56) |          | 2G3O(20) |        | 2F(57)   |          |          |        |          |          | 4F(5)  | (61)   | 2G2O(59) | 2G2O(56) |
| 5  | 4G4O(50) | 4G4O(45) | 4G4O(47) | 4G4O(53) | 2G       | 4F(50) | 4G4O(46) | 4G4O(52) | 5F(4)  | 5F(6)    | 4G4O(49) | 6G4O(49) | 4F(48) | 4F2G2O   | 4G4O(55) | 4F(45) | 4F(38) | 4G4O(51) | 4G4O(48) |
|    | 2G2O(50) | 2G2O(53) | 2G2O(53) | 2G2O(47) | (100)    | 2F(50) | 2G2O(54) | 2G2O(48) | 3F(4)  | 4F(44)   | 2G2O(51) | 3G2O(51) | 2F(52) | (51)     | 2G2O(45) | 2F(45) | 3F(18) | 2G2O(49) | 2G2O(52) |
|    |          |          |          |          |          |        |          |          | 4F(40) | 2F(50)   |          |          |        | 2F1G1O   |          |        | 2F(44) |          |          |
| 6  | 4G4O(90) | 4G3O(90) | 3G3O(90) | 4G4O(95) | 2G(90)   | 3F(90) | 3G3O(93) | 4G3O(90) | 3F(90) | 3F(10)   | 3G3O(90) | 6G4O(95) | 3F(88) | 6G6O(82) | 4G4O(92) | 4F(93) | 4F(82) | 3G4O(83) | 4G4O(82) |
|    | 2G2O(10) | 2G2O(10) | 2G2O(10) | 2G2O(5)  |          | 2F(90) | 2G2O(3)  | 4G2O(5)  | 2F(10) | 2F(90)   | 2G2O(10) | 2G2O(5)  | 2F(8)  | 3G3O(11) | 2G2O(8)  | 2F(7)  | 3F(14) | 4G4O(10) | MG4O(11) |
|    |          |          |          |          |          |        | 4G4O(4)  | 2G2O(5)  |        |          |          |          |        | 2G2O(7)  |          |        | 2F(4)  | 2G2O(7)  | 2G2O(7)  |
| 7  | 4G4O(50) | 4G4O(53) | 4G4O(50) | 4G4O(52) | 2G2O(50) | 4F(52) | 4G4O(48) | 4G4O(51) | 4F(56) | 4F(46)   | 4G4O(49) | 6G4O(50) | 4F(46) | 2F4G4O   | 4G4O     | 4F(50) | 4F(76) | 4G4O(50) | 4G4O(50) |
|    | 2G2O(50) | 2G2O(47) | 2G2O(50) | 2G2O(48) | GO(50)   | 3F(4)  | 2G2O(52) | 2G2O(49) | 5F(3)  | 2F(54)   | 2G2O(51) | 3G2O(50) | 5F(4)  | (50)     | (47)     | 2F(50) | 2F(24) | 2G2O(50) | 2G2O(50) |
|    |          |          |          |          |          | 2F(44) |          |          | 2F(41) |          |          |          | 2F(50) | 1F2G2O   | 2G2O(53) |        |        |          |          |
| 8  | 4G4O(39) | 4G4O(40) | 4G4O(47) | 4G4O(43) | 2G2O(58) | 4F(36) | 4G4O(43) | 6G4O(39) | 4F(40) | 4F(40)   | 4G2O(39) | 4G4O(42) | 4F(44) | 4G4O(37) | 4G4O(37) | 6F(41) | 4F(40) | 4G4O(34) | 4G4O(40) |
|    | 2G2O(61) | 2G2O(60) | 2G2O(53) | 2G2O(57) | 1G1O(42) | 2F(64) | 2G2O(57) | 3G2O(61) | 2F(40) | 2F(60)   | 2G1O(61) | 2G2O(58) | 2F(56) | 2G2O(63) | 2G2O(63) | 3F(59) | 2F(60) | 2G2O(66) | 2G2O(60) |
|    |          |          |          |          |          |        |          |          |        |          |          |          |        |          |          |        |        |          |          |
| 9  | 2G4O(55) | 4G4O(58) | 4G3O(56) | 2G4O(56) | 2G2O     | 4F(60) | 4G6O(58) | 4G4O(60) | 4F(58) | 4F(48)   | 3G3O(78) | 4G4O(60) | 6F(56) | 4G4O(60) | 4G4O(59) | 4F(56) | 1F(10) | 4G4O(64) | 4G4O(56) |
|    | 1G2O(16) | 2G2O(42) | 2G2O(44) | 1G2O(20) | (55)     | 2F(40) | 2G3O(31) | 2G2O(40) | 2F(42) | 3F(10)   | 4G4O(6)  | 2G2O(40) | 3F(44) | 7G7O(1)  | 2G2O(41) | 2F(44) | 2F(89) | 2G2O(36) | 2G2G(44) |
|    | 2G5O(4)  |          |          | 2G2O(24) | GO(45)   |        | 2G2O(11) |          | 2F(44) | 2G2O(16) |          |          |        | 2G2O(39) |          | 4F(1)  |        |          |          |
| 10 | 4G4O(35) | 4G4O(42) | 4G4O(37) | 4G4O(34) | 2G2O(48) | 4F(36) | 4G4O(37) | 4G4O(36) | 5F(5)  | 4F(37)   | 4G4O(36) | 4G4O(38) | 4F(31) | 4G4O(32) | 4F2G2O   | 4F(33) | 2F(48) | 4G4O(37) | 4G4O(32) |
|    | 2G2O(65) | 2G2O(58) | 2G2O(63) | 2G2O(66) | 1G1O(52) | 2F(64) | 2G2O(63) | 2G2O(64) | 3F(10) | 2F(63)   | 2G2O(64) | 2G2O(62) | 2F(69) | 4G5O(4)  | (34)     | 2F(67) | 3F(18) | 2G2O(63) | 6G6O(1)  |
|    |          |          |          |          |          |        |          |          | 4F(20) |          |          |          |        | 2G2O(64) | 2F1O1G   |        | 4F(34) |          | 2G2O(67) |
|    |          |          |          |          |          |        |          | 2F(65)   |        |          |          |          |        | (66)     |          |        |        |          |          |

**Note:** 1 = At diagnosis; 2 = At relapse

**Abbreviation :** G = green signal; O = red signal; M = multiple signals; F = yellow signal.

**Table S3:** Main Characteristics of Patients with AML with ins (21;8).

| Case | Age/Sex | FAB | Cytogenetic analysis                                                            | Revised cytogenetic result following FISH                                                | Response <sup>b</sup> | Reference                       |
|------|---------|-----|---------------------------------------------------------------------------------|------------------------------------------------------------------------------------------|-----------------------|---------------------------------|
| 1    | 2.9/F   | M2  | 45,X,-X                                                                         | 45,X,-X,der(7)t(7;8)(q34;q24),ins(21;8)(q22;q22q22)                                      | CCR                   |                                 |
| 2    | 12.2/M  | M1  | 47,XY,+8/46,XY                                                                  | 46,XY,ins(21;8)(q22;q22q22)/47,XY,+8,ins(21;8)(q22;q22q22)                               | CR                    | Gamerdinger et al., 2003        |
| 3    | 3.8/F   | M1  | 47,XX,der(3)t(3;?8)(q27;?q13),der(21)t(8;21)(q22;q22),+?der(21)t(8;21)(q22;q22) | 47,XX,der(3)t(3;8)(q29;q13)del(8)(q21q22),+8,der(8)t(3;8)(q29;q13),ins(21;8)(q22;q21q22) | CCR                   |                                 |
| 4    | 43/M    | M2  | 45,X,-Y                                                                         | 45,X,-Y,ins(21;8)(q22;q22q22)                                                            | CR                    | Onozawa et al., 2003            |
| 5    | 73/F    | M2  | 46,XX,ins(21;8)(q12;q13q22)                                                     | 46,XX,ins(21;8)(q12;q13q22)                                                              | CR                    | Yamazaki et al., 2000           |
| 6    | 37/M    | M2  | 46,XY,ins(21;8)(q22;q21q22)                                                     | 46,XY,ins(21;8)(q22;q21q22)                                                              | NA                    | Harrison et al., 1999           |
| 7    | NA      | M2  | ins(21;8),del(8) <sup>a</sup>                                                   | ins(21;8) <sup>a</sup>                                                                   | NA                    | Kazama et al., 1996             |
| 8    | 48/F    | M2  | NA                                                                              | 46,XX,ins(21;8)(q22;q21q22)                                                              | CR                    |                                 |
| 9    | 10/F    | M2  | 46,XX[20]                                                                       | 46,XX,ins(21;8)(q22;q21q22)                                                              | CR                    |                                 |
| 10   | 43/M    | M2  | 46,XY[1]/46,XY,t(8;21)(q22;q22)[14]                                             | 46,XY,ins(21;8)(q22;q11q22)                                                              | CR                    | Giorgina Specchia, et al., 2004 |
| 11   | 54/M    | M2  | 46,XY[20]                                                                       | 46,XY,ins(21;8)(q22;q21q22)                                                              | CCR                   |                                 |
| 12   | 19/F    | M2  | 46,XY[20]                                                                       | 46,XX,ins(21;8)(q22;q13q22)                                                              | CR                    |                                 |
| 13   | 48/M    | M2  | 47,XY,+8[22]                                                                    | 47,XY,p8,ins(21;8)(q22;q22q22)                                                           | ED                    | Frank G, et al., 2011           |
| 14   | 47/M    | M2  | 45,X,-Y,t(8;21)(q22;q22)[20].                                                   | 45,X,-Y,der(8)inv(8)(q22q24.1)ins(21;8)(q22;q12q22),der(21)ins(21;8)(q22;q12q22)         | CR                    | Jae-Hee Lee, et al., 2014       |
| 15   | 23/M    | M2  | 92,XXYY,t(8,21)(q22;q21)X2[8]/46,t(8;21)(q22;q21)[12]                           | 92,XXYY,ins(21;8)(q22;q24;q22)                                                           | R                     | In our present case             |

**Note:** <sup>a</sup>: Partial cytogenetic data are available.<sup>b</sup>: CR = complete remission;

**Abbreviation :** CCR = continuous complete remission; R = Relapse;
